# Supplementary material
Source: publisher site journal article supplement (https://www.degruyterbrill.com/publication/journal_key/OPPHIL/downloadAsset/OPPHIL_Topical%20Issue%20Proposal%20Form.doc)
Supplement: Supplementary file 1 [file OPPHIL_Topical%20Issue%20Proposal%20Form.doc]

**Open Philosophy – Topical Issue Proposal Form**

*Please fill the form and send to:* [*katarzyna.tempczyk@degruyteropen.com*](mailto:katarzyna.tempczyk@degruyteropen.com)

**Contact person**

Name:

Institution:

E-mail:

**Type of issue**

Conference Place: Date: Link to conference:

Other

**Topic/Subject of special issue**

**Scope of the issue**

**Short description of content**

**Guest editor**

Name:

Institution:

E-mail:

**Estimated number of manuscripts**

**Date for all manuscripts to be submitted**
